# Supplementary material
Source: PubMed Central journal article supplement (PMC3790596)
Supplement: jf401960m_si_001.pdf [file jf401960m_si_001.pdf]

## SUPPORTING INFORMATION

### Amoxidation of Lignocellulosic Materials: Formation of *non*-Heterocyclic Nitrogenous Compounds from Monosaccharides

Karl Michael Klinger, Falk Liebner,\* Takashi Hosoya, Antje Potthast, Thomas Rosenau

University of Natural Resources and Life Sciences Vienna, Austria

Department of Chemistry, UFT Tulln, Konrad-Lorenz-Straße 24, A-3430 Tulln

\*To whom correspondence should be addressed: Tel, +43-1-47654-6458; Fax, +43-1-47654-6059; E-mail: [falk.liebner@boku.ac.at](mailto:falk.liebner@boku.ac.at)

Table S1. Relative Amount of Other Nitrogenous Compounds in the Crude Products Obtained by Amoxidation of D-Glucose at 70 °C, 100 °C and 140 °C (0.2 MPa O<sub>2</sub>, 3 h).

| Rt (min)                                | Compound                | 70 °C                                | 100 °C | 140 °C |
|-----------------------------------------|-------------------------|--------------------------------------|--------|--------|
|                                         |                         | Relative percentage [%] <sup>d</sup> |        |        |
| 8.56 <sup>a,b</sup> , 16.7 <sup>b</sup> | Urea (10)               | 1.10                                 | 0.34   | 0.36   |
| 11.41 <sup>b</sup> , 15.53 <sup>c</sup> | Ammonium carbamate (34) | 0.14                                 | 0.16   | 0.05   |
| 13.6 <sup>b</sup>                       | Ammonium oxalate (37)   | 1.94                                 | 0.81   | 3.36   |
| 7.16 <sup>b</sup>                       | Acetamide (86)          | 0.09                                 | 0.07   | 0.00   |

Numbers in parentheses refer to peak numbering as given in Table 1. <sup>a</sup> carbodiimide derivative; <sup>b</sup> bis TMS derivative; <sup>c</sup> tris TMS derivative; <sup>d</sup> Values were calculated as ratio of the relative peak areas of the analytes and that obtained from 200 µg of the internal standard phenyl  $\alpha$ -glucopyranoside.

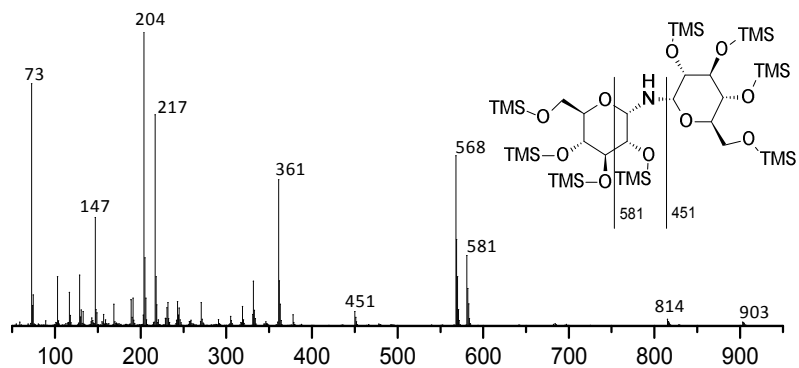

Figure S1. EI-MS (70 eV) spectrum of octakis-*O*-TMS di(glucopyranosyl) amine. Assignment in accordance with literature:<sup>1-4</sup>  $m/z$  903 ( $M^+ - CH_3$ ), 814 ( $M^+ - [CH_2O-TMS]$ ), 581 ([tetra-*O*-TMS glucopyranosylamine-CH=CH-O-TMS]<sup>+</sup>), 568 (tetra-*O*-TMS glucopyranosylamine-CH<sup>+</sup>-O-TMS), 451 ([tetra-*O*-TMS glucopyranosyl]<sup>+</sup>), 361 (451 - [HO-TMS]).

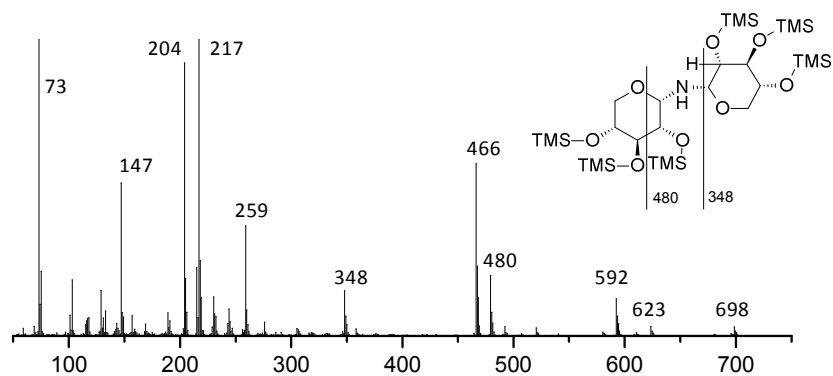

Figure S2. EI-MS (70 eV) spectrum of hexakis-*O*-TMS di(xylopyranosyl) amine.

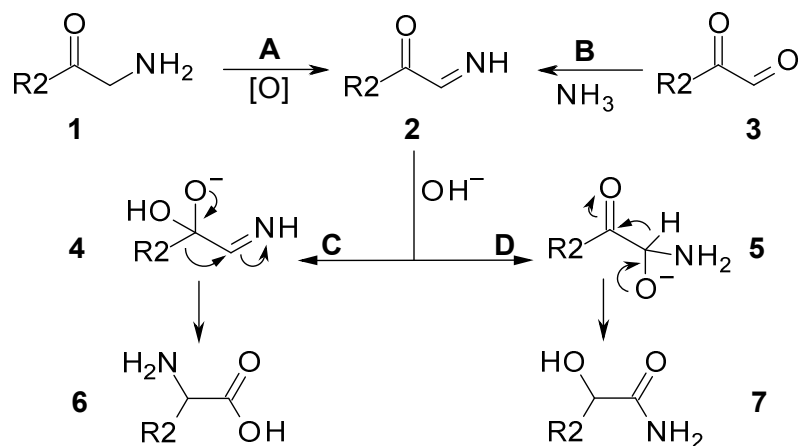

Figure S3. Proposed reaction mechanisms for the formation of  $\alpha$ -amino acids and  $\alpha$ -hydroxyamides.

**EI-MS (70 eV) fragmentation pattern of persilylated commercial *N*-heterocyclic compounds.**

***N,O*-bis(trimethylsilyl)-lactamide:**  $m/z$  233 ( $M^+$ ; 0.7%), 218 ( $M^+ - \text{CH}_3$ ; 11.8%), 188 (29.4%), 147 ( $(\text{SiMe}_3)\text{O}^+(\text{SiMe}_2)$ ; 44.5%), 133 (6.0%), 117 ( $\text{CH}_3\text{C}^+\text{HOSiMe}_3$ ; 39.6%), 103 (3.9%), 90 ( $\text{SiMe}_3\text{OH}$ ; 6.4%), 73 ( $\text{SiMe}_3$ ; 100%), 59 (5.2%).

***N,O*-bis(trimethylsilyl)-glycolamide:**  $m/z$  219 ( $M^+$ ; 1.5%), 204 ( $M^+ - \text{CH}_3$ ; 26.0%), 188 (44.6%), 177 (3.8%), 158 (1.9%), 147 ( $(\text{SiMe}_3)\text{O}^+(\text{SiMe}_2)$ ; 38.7%), 133 (6.8%), 116 (12.4%), 104 (28.9%), 95 (2.4%), 89 (10.6%), 73 (100%), 66 (7.4%).

**Tris(trimethylsilyl)carbamate:**  $m/z$  262 ( $M^+ - \text{CH}_3$ ; 23.2%), 174 ( $\text{SiMe}_3\text{NHC}^+\text{OSiMe}_2$ ; 7.0%), 147 ( $(\text{SiMe}_3)\text{O}(\text{SiMe}_2)$ ; 100%), 131 (5.1%), 117 (1.4%), 100 (5.3%), 73 (31.5%).

## References

1. DeJongh, D. C.; Radford, T.; Hribar, J. D.; Hanessian, S.; Bieber, M.; Dawson, G.; Sweeley, C. C., Analysis of trimethylsilyl derivatives of carbohydrates by gas chromatography and mass spectrometry. *Journal of the American Chemical Society* **1969**, *91*, 1728-1740.
2. Wolfrom, M. L.; Kashimura, N.; Horton, D., Detection of Maillard browning reaction products as trimethylsilyl derivatives by gas-liquid chromatography. *J. Agric. Food Chem.* **1974**, *22*, 791-5.
3. Funcke, W.; Henneberg, D.; Von, S. C.; Klemer, A., Distinction between glycosylamines and Amadori products by mass spectrometry of their trimethylsilyl derivatives. *Org. Mass Spectrom.* **1979**, *14*, 220-1.
4. Fuezfai, Z.; Boldizsar, I.; Molnar-Perl, I., Characteristic fragmentation patterns of the trimethylsilyl and trimethylsilyl-oxime derivatives of various saccharides as obtained by gas chromatography coupled to ion-trap mass spectrometry. *J. Chromatogr., A* **2008**, *1177*, 183-189.
